# Supplementary material
Source: publisher figshare collection journal article supplement (https://frontiersin.figshare.com/ndownloader/files/25276805)
Supplement: Supplementary file [file 25276805]

CLUSTAL O(1.2.4) multiple sequence alignment

S7ZXM4 - **PDE\_04455** - *Penicillium oxalicum* (strain 114-2)  
 Q5B705 - **CPCA** - *Aspergillus nidulans* (strain FGSC A4)  
 P11115 - **cpc-1** - *Neurospora crassa* (strain OR74A)  
 P03069 - **GCN4** - *Saccharomyces cerevisiae* (strain S288c)

```

TR|S7ZXM4|S7ZXM4_PENO1 MESPFTGPLNFSIASRSSSSPQIIISPIDFTSFTTDDSSQQPWPPTPPSTQPLASNSINSN 60
TR|Q5B705|Q5B705_EMENI -----
SP|P11115|CPC1_NEUCR -----
SP|P03069|GCN4_YEAST -----

TR|S7ZXM4|S7ZXM4_PENO1 NSSSNSSLQDFVLYPTPPASQPQPPPRDSRLLAPPSTTLKPSALQPFLAQHQPRRHTLSL 120
TR|Q5B705|Q5B705_EMENI -----
SP|P11115|CPC1_NEUCR -----
SP|P03069|GCN4_YEAST -----

TR|S7ZXM4|S7ZXM4_PENO1 QLQRYLQQQLSSGLPISDPRVAKLARSFAHWSHSNSSSYAQQPHAAAVPSPLRPQSGAQF 180
TR|Q5B705|Q5B705_EMENI -----
SP|P11115|CPC1_NEUCR -----
SP|P03069|GCN4_YEAST -----

TR|S7ZXM4|S7ZXM4_PENO1 IPTLKKPYTTAYRRTMSAPGFEGTHLHHPVVPDSSPLAHTHATELDAALFALPSAGDT 240
TR|Q5B705|Q5B705_EMENI -----MSTPNIPH----QGEFGCPGSFWL--GLRTNLDDPEFF----DFT 35
SP|P11115|CPC1_NEUCR -----MFSELDLLDFATFDGGAT 18
SP|P03069|GCN4_YEAST -----MSEYQPSLFALNPMGFS 17
                                     :: : * . :

TR|S7ZXM4|S7ZXM4_PENO1 AGLGSPFDIGQI-----HLDTDV---NAFSPGAPTDTVSPKDVMD--A--S- 280
TR|Q5B705|Q5B705_EMENI EFGGEDFTDPTMLSPH-----LVPTGIMASKDSLGDVPAGTVSPSDLFMD-----A- 81
SP|P11115|CPC1_NEUCR -----TEAAFASPA-----NQTYDL-SSSVSSVSNMGTVSPQELLLH--EPYL- 59
SP|P03069|GCN4_YEAST PLDGSKSTNENVSASTSTAKPMVGLIFDKFIKTEEDPIIKQD--TPSNLDFDFALPQTA 75
                                     . . . . :*::: ..
  
```

```

TR|S7ZXM4|S7ZXM4_PENO1 SVP-----PSATFTDLSTPLL--ESPGAFSSGSPMFTDLDL--LGPNDWTPLFNDAAA 330
TR|Q5B705|Q5B705_EMENI SAP-----PSTSFTDLSTPSF--DSPGYFSQDTSPVFGADLDLAPGHEEWAPLFPSNDG 133
SP|P11115|CPC1_NEUCR   SAP-----SSTALTALTSPSLFDGSPDFDTFDISPNFGHSDL--ENPDTWFSLFPDATP 111
SP|P03069|GCN4_YEAST   TAPDAKTVLPPIPELDDAVVESFFS-----SSTDSTPMFEYEN-LEDNSKEWTSLFDNDIP 129
:.*                :           :           : . : * *           . . * ** .

TR|S7ZXM4|S7ZXM4_PENO1 MDAFQS---LAMVAPLEETSKTEKPLPAQTPKLAASVQ-----SV----- 367
TR|Q5B705|Q5B705_EMENI MSMPFDPTGLEIAAPVPAVK-AEPTV-----SSPTVK-----PV----- 166
SP|P11115|CPC1_NEUCR   LPQAQAQVQTQPQTQ-TQTEQQTQPLPELVQSVQPTVQP--TVEQTVHSVEASPATPSED 168
SP|P03069|GCN4_YEAST   VTTDDVSLADKAIESTEESVS----LVPSNLEVSTTSFLPTPVLEDAK-----LTQT 176
:                ..           :           :.

TR|S7ZXM4|S7ZXM4_PENO1 -----SSPI-----SATGSSKPSSVAGIN-RP-RKELSPIA-FDPSDPVAAKRARN 410
TR|Q5B705|Q5B705_EMENI -----SSPARSP--TATSRSTTKHSTVAGVSARR-SKPLPPIK-YDESDPVAAKRARN 215
SP|P11115|CPC1_NEUCR   LEVLSPGSGHQRRK--SSVSPPSGRHSSVAGVGSRRRDKPLPPIIVEDPSDVVAMKRARN 226
SP|P03069|GCN4_YEAST   RKVKKPNSVVKSHHVGKDDDESRLDHLGVVAYNRKQRSIPLSPIV-PESSDPAALKRARN 235
                *                *.. . :           * **           : ** .* *****

TR|S7ZXM4|S7ZXM4_PENO1 TEAARKSRARKLERQMSAEARISELQKQLADRDAIIANLQAQLEAQRQFA- 460
TR|Q5B705|Q5B705_EMENI TEAARKSRARKLERQGMERRIAELSKELEETROMVEFWKSQAQARARGA- 265
SP|P11115|CPC1_NEUCR   TLAARKSRERKAQRLEELEAKIEELIAERDR-----WKNLALAHGASTE 270
SP|P03069|GCN4_YEAST   TEAARRSRARKLQRMKQLEDKVEELLSKNYHLENEVARLKKLVGER----- 281
* ***:** :* :* . * :: ** :           :           :

```



```

TR|S7ZFQ0|S7ZFQ0_PEN01      --QPFDGISAINRGTFSSSLQRLREAAFQLRETNDIQMADIWVTTQWMQAILWRASMSRR 353
TR|A0A1Q5UN98|A0A1Q5UN98_9EURO QLPPEYEGMHALNRNSFSLQHQQLREASIQLKETNDVQMADICVTTQWMQAILWRASMSRR 417
TR|A0A0F7TSE6|A0A0F7TSE6_PENBI QLPPEYEGMPALNRNSFSLQQLREASIQPRETNVVQMADICVTTQWMQAILWRASMSRR 419
      *::*: *:*.*:* ** *****:.* :*** :***** ***** **

TR|S7ZFQ0|S7ZFQ0_PEN01      FATFDTPQQPVTSISHPIQIAKDFLEAMSRLPSSALEAHGPAM-----EY 398
TR|A0A1Q5UN98|A0A1Q5UN98_9EURO -STLDSSQQHITSLSHPIQIAKDFLETMSHLPSSAIEAHGPAMVSNKNTLNEDESKLSEY 476
TR|A0A0F7TSE6|A0A0F7TSE6_PENBI -STLDSPPQQTTSLSHPIQIAKEFLETMSHLPSSAIEAHGPAM-----EY 463
      *::*: ** *:*.******.***:*:*:*:*:*:*:*:*:* **

TR|S7ZFQ0|S7ZFQ0_PEN01      KIFEIAKAVTDSVTTGLNDPTISIELSRDILHRLQSKLASFRGGNKTLSSLHARISAAL 458
TR|A0A1Q5UN98|A0A1Q5UN98_9EURO KIYEIAKAVTDSVTTEFNGQPISLDIPREILLRLQSKLASCRGGNKVLLPLLHARISEAL 536
TR|A0A0F7TSE6|A0A0F7TSE6_PENBI KIYEIARAVVDSITTEFNGQPISLDIPRAILLRLQSKLASCRGGNKILLPLLHARISEAL 523
      **:*:*:*:*.***:*:* :*. **::: * ** ***** ** ** ** ** ** ** ** ** ** ** ** ** ** ** ** ** ** ** ** ** ** ** ** ** ** ** ** ** ** **

TR|S7ZFQ0|S7ZFQ0_PEN01      QDTNQRICNDSPPQDDRPVSSFSQGKHIYYPDHQIQPLPLVGPVPLRNFGTHGDMASRPG 518
TR|A0A1Q5UN98|A0A1Q5UN98_9EURO LRPSPRIYKIS---DYDPSSKPLSGERMLYSSQQSQSVPLSNPPSLRPAEIIYEQQVNTTEG 593
TR|A0A0F7TSE6|A0A0F7TSE6_PENBI LRPSPRDYKIS---DFGPSSKPLSRDTPYSSQQPQILPLPSSPPLGYAEVYEEQGNLEG 580
      . * : * * * * . . : * .:* * :** . * : : . *

TR|S7ZFQ0|S7ZFQ0_PEN01      QKSPHAMNDSLSTLHLMSWDHNLPEGFQSPHQDA-----LLSSTLADLDAAGAMELLFAN 573
TR|A0A1Q5UN98|A0A1Q5UN98_9EURO QEELSQYTTDIVPTLRVVSWDHNIPDILLSSDQDPFNQAQVFGSFGNIESAGTVEFLFAN 653
TR|A0A0F7TSE6|A0A0F7TSE6_PENBI RELPQDPTDNVSTLRVVTWDHNIPDILFSSDQYPFTAQVFGSFDNIDSTGTIEFLNN 640
      :: : .* : **:::*:*:*:*:*:*:*:* : * .* :::: ::::*:*:*:*:* *

TR|S7ZFQ0|S7ZFQ0_PEN01      SAMWDSVENWDFQATEGAAV 593
TR|A0A1Q5UN98|A0A1Q5UN98_9EURO NAIWDSNESWDSQFTGAASG 673
TR|A0A0F7TSE6|A0A0F7TSE6_PENBI NTMLDSGESWESQFCGAAAG 660
      .:: ** *.*: * .*:

```
